# Supplementary material
Source: publisher site journal article supplement (https://www.dovepress.com/article/368805)

*Supplementary Materials for:*

# Evaluation by survival analysis of cold pain tolerance in patients with fibromyalgia and opioid use

Eden Z. Deng, Daniel P. Weikel, MSc, Katherine T. Martucci, PhD

**Supplementary Figure S1.** Counts of missing data. (**A**) Number of missing variables for each measure collected from healthy control participants. (**B**) Number of missing variables for each measure collected from patients with fibromyalgia.


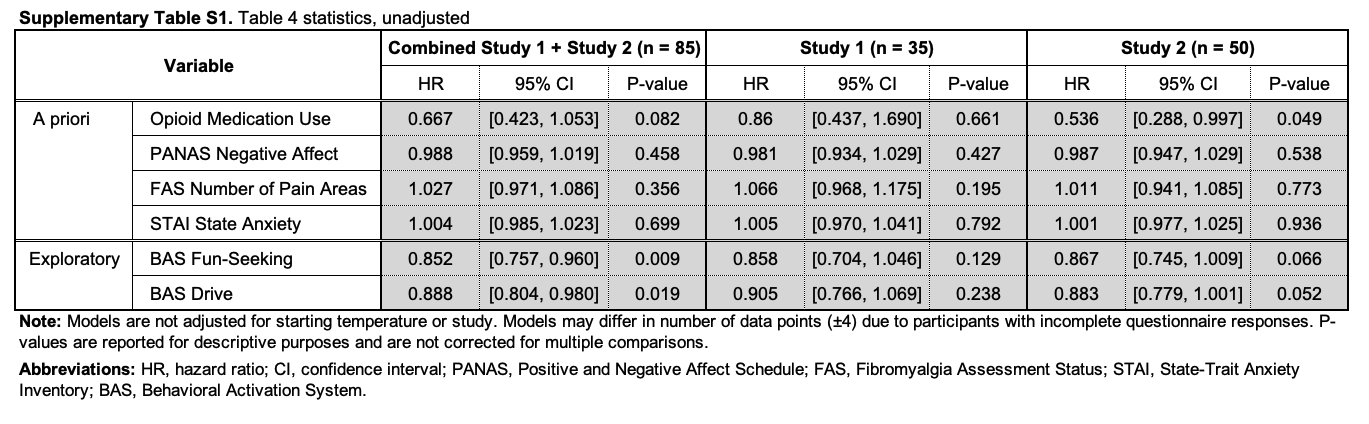


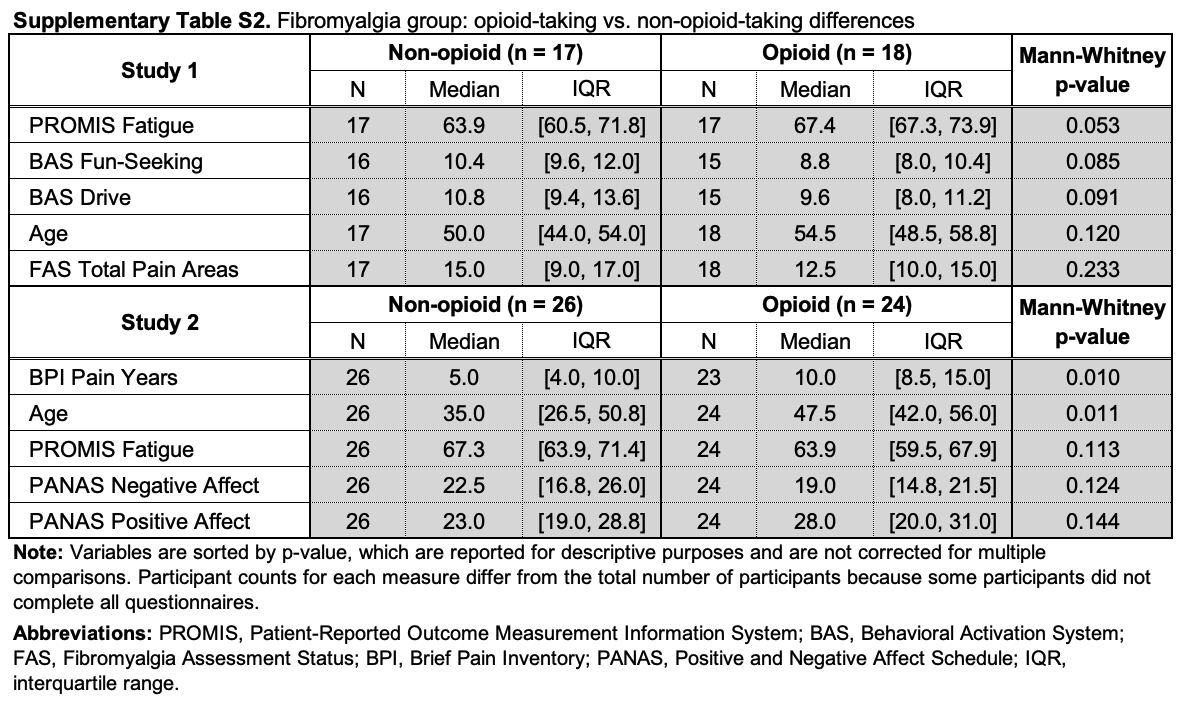


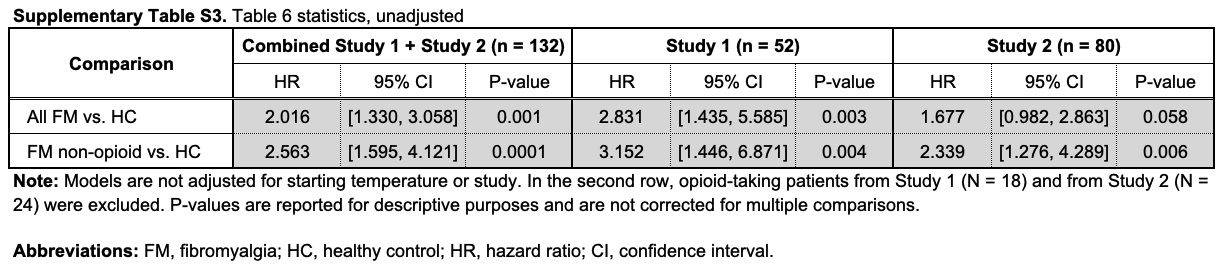

Supplement: Supplementary file 1 [file get_supplementary_file.php]
